# Supplementary material
Source: PubMed Central journal article supplement (PMC4365214)
Supplement: JCM.02460-14_zjm999094134so2.pdf [file JCM.02460-14_zjm999094134so2.pdf]

**Table S1. MLST and SLST data for *P. acnes* isolates from WGS projects and previously published studies**

| Isolate <sup>a</sup>  | Region  | Source | Phylogroup      | MLST <sub>8</sub> scheme <sup>g</sup> |    |    | SLST type <sup>h</sup> |
|-----------------------|---------|--------|-----------------|---------------------------------------|----|----|------------------------|
|                       |         |        |                 | Allelic profile                       | ST | CC |                        |
| NCTC737 <sup>b</sup>  | UK      | Acne   | IA <sub>1</sub> | 1-1-1-3-1-1-1-1                       | 1  | 1  | A1                     |
| HL072PA2              | USA     | Acne   | IA <sub>1</sub> | 1-1-1-3-1-1-1-1                       | 1  | 1  | A6                     |
| HL072PA1              | USA     | Acne   | IA <sub>1</sub> | 1-1-1-3-1-1-1-1                       | 1  | 1  | A6                     |
| J165                  | USA     | Skin   | IA <sub>1</sub> | 1-1-1-3-1-1-1-1                       | 1  | 1  | A1                     |
| HL013PA2              | USA     | Acne   | IA <sub>1</sub> | 1-1-1-3-1-1-1-1                       | 1  | 1  | A1                     |
| HL087PA2              | USA     | Acne   | IA <sub>1</sub> | 1-1-1-3-1-1-1-1                       | 1  | 1  | A1                     |
| HL063PA1              | USA     | Skin   | IA <sub>1</sub> | 1-1-1-3-1-1-1-1                       | 1  | 1  | A1                     |
| HL027PA2              | USA     | Skin   | IA <sub>1</sub> | 1-1-1-3-1-1-1-1                       | 1  | 1  | A1                     |
| HL002PA3              | USA     | Acne   | IA <sub>1</sub> | 1-1-1-3-1-1-1-1                       | 1  | 1  | A2                     |
| HL002PA2              | USA     | Acne   | IA <sub>1</sub> | 1-1-1-3-1-1-1-1                       | 1  | 1  | A2                     |
| HL046PA2              | USA     | Acne   | IA <sub>1</sub> | 1-1-1-3-1-1-1-1                       | 1  | 1  | A2                     |
| HL036PA3              | USA     | Skin   | IA <sub>1</sub> | 1-1-1-3-1-1-1-1                       | 1  | 1  | A2                     |
| HL036PA2              | USA     | Skin   | IA <sub>1</sub> | 1-1-1-3-1-1-1-1                       | 1  | 1  | A2                     |
| HL036PA1              | USA     | Skin   | IA <sub>1</sub> | 1-1-1-3-1-1-1-1                       | 1  | 1  | A2                     |
| 5U42AFAA <sup>c</sup> | Canada  | ND     | IA <sub>1</sub> | 1-1-1-3-1-1-1-1                       | 1  | 1  | A1                     |
| KPL2003 <sup>c</sup>  | USA     | ND     | IA <sub>1</sub> | 1-1-1-3-1-1-1-1                       | 1  | 1  | A1                     |
| DSM1897               | USA     | ND     | IA <sub>1</sub> | 1-1-1-3-1-1-1-1                       | 1  | 1  | A1                     |
| 15.2.L1               | Denmark | [20]   | IA <sub>1</sub> | 1-1-1-3-1-1-1-1                       | 1  | 1  | A1                     |
| 27.1.R1               | Denmark | [20]   | IA <sub>1</sub> | 1-1-1-3-1-1-1-1                       | 1  | 1  | A1                     |
| 32.1.L2               | Denmark | [20]   | IA <sub>1</sub> | 1-1-1-3-1-1-1-1                       | 1  | 1  | A1                     |
| 37.1.L1               | Denmark | [20]   | IA <sub>1</sub> | 1-1-1-3-1-1-1-1                       | 1  | 1  | A1                     |
| 43.1.L1               | Denmark | [20]   | IA <sub>1</sub> | 1-1-1-3-1-1-1-1                       | 1  | 1  | A1                     |
| 44.1.L1               | Denmark | [20]   | IA <sub>1</sub> | 1-1-1-3-1-1-1-1                       | 1  | 1  | A1                     |
| 46.1.L1               | Denmark | [20]   | IA <sub>1</sub> | 1-1-1-3-1-1-1-1                       | 1  | 1  | A1                     |
| 48.1.L1               | Denmark | [20]   | IA <sub>1</sub> | 1-1-1-3-1-1-1-1                       | 1  | 1  | A1                     |
| 49.1.L1               | Denmark | [20]   | IA <sub>1</sub> | 1-1-1-3-1-1-1-1                       | 1  | 1  | A1                     |
| HL096PA3              | USA     | Skin   | IA <sub>1</sub> | 1-1-1-3-1-1-3-1                       | 8  | 1  | A1                     |

|                      |         |             |                 |                  |     |   |    |
|----------------------|---------|-------------|-----------------|------------------|-----|---|----|
| HL020PA1             | USA     | Acne        | IA <sub>1</sub> | 1-1-1-3-1-1-4-1  | 9   | 1 | A1 |
| HL005PA2             | USA     | Skin        | IA <sub>1</sub> | 1-1-10-3-1-1-6-1 | 15  | 1 | A1 |
| HL005PA3             | USA     | Skin        | IA <sub>1</sub> | 1-1-10-3-1-1-1-1 | 16  | 1 | A1 |
| 266                  | Germany | Pulmonary   | IA <sub>1</sub> | 5-1-1-3-1-1-1-1  | 20  | 1 | A1 |
| 12.1.L1              | Denmark | [20]        | IA <sub>1</sub> | 5-1-1-3-1-1-1-1  | 20  | 1 | A1 |
| HL099PA1             | USA     | Acne        | IA <sub>1</sub> | 1-1-1-3-1-1-2-2  | 3   | 3 | C1 |
| HL056PA1             | USA     | Skin        | IA <sub>1</sub> | 1-1-1-3-1-1-2-2  | 3   | 3 | C2 |
| HL096PA2             | USA     | Skin        | IA <sub>1</sub> | 1-1-1-3-1-1-2-2  | 3   | 3 | C1 |
| HL053PA1             | USA     | Acne        | IA <sub>1</sub> | 1-1-1-3-1-1-2-2  | 3   | 3 | C2 |
| HL074PA1             | USA     | Skin        | IA <sub>1</sub> | 1-1-1-3-1-1-2-2  | 3   | 3 | C2 |
| HL007PA1             | USA     | Skin        | IA <sub>1</sub> | 1-1-1-3-1-1-2-2  | 3   | 3 | C1 |
| HL043PA1             | USA     | Acne        | IA <sub>1</sub> | 1-1-1-3-1-1-2-2  | 3   | 3 | C1 |
| HL043PA2             | USA     | Acne        | IA <sub>1</sub> | 1-1-1-3-1-1-2-2  | 3   | 3 | C1 |
| HL083PA1             | USA     | Acne        | IA <sub>1</sub> | 1-1-1-3-1-1-2-2  | 3   | 3 | C1 |
| HL096PA1             | USA     | Acne        | IA <sub>1</sub> | 1-1-1-3-1-1-2-2  | 3   | 3 | C1 |
| 15.1.R1              | Denmark | [20]        | IA <sub>1</sub> | 1-1-1-3-1-1-2-2  | 3   | 3 | C1 |
| KPL2009 <sup>c</sup> | USA     | ND          | IA <sub>1</sub> | 1-1-1-3-1-1-2-2  | 3   | 3 | C1 |
| HL005PA1             | USA     | Skin        | IA <sub>1</sub> | 1-1-1-3-1-1-5-2  | 11  | 3 | C2 |
| HL038PA1             | USA     | Acne        | IA <sub>1</sub> | 1-1-1-3-1-1-2-4  | 10  | 3 | C1 |
| HL078PA1             | USA     | Skin        | IA <sub>1</sub> | 1-1-1-3-1-14-2-3 | 14  | 3 | B1 |
| HL045PA1             | USA     | Acne        | IA <sub>1</sub> | 1-10-1-3-1-1-2-2 | 17  | 3 | C2 |
| SK137                | USA     | Skin        | IA <sub>1</sub> | 8-1-1-3-1-1-2-5  | 18  | 3 | C1 |
| FZ1/2/0              | Hungary | Skin        | IA <sub>1</sub> | 1-1-1-3-1-1-2-3  | 31  | 3 | B1 |
| C1                   | Japan   | Sarcoidosis | IA <sub>1</sub> | 1-1-1-3-1-1-22-2 | 115 | 3 | A5 |
| KPL1854 <sup>c</sup> | USA     | ND          | IA <sub>1</sub> | 1-1-1-3-1-17-2-2 | 120 | 3 | C3 |
| SK182                | USA     | Skin        | IA <sub>1</sub> | 1-13-1-3-1-1-2-5 | 29  | S | C1 |
| HL025PA1             | USA     | Skin        | IA <sub>1</sub> | 1-1-1-3-1-1-8-6  | 4   | 4 | D1 |
| HL086PA1             | USA     | Skin        | IA <sub>1</sub> | 1-1-1-3-1-1-8-6  | 4   | 4 | E4 |
| HL092PA1             | USA     | Acne        | IA <sub>1</sub> | 1-1-1-3-1-1-8-6  | 4   | 4 | E1 |
| HL110PA1             | USA     | Acne        | IA <sub>1</sub> | 1-1-1-3-1-1-8-6  | 4   | 4 | E1 |
| HL053PA2             | USA     | Acne        | IA <sub>1</sub> | 1-1-1-3-1-1-8-6  | 4   | 4 | E1 |

|                        |         |                 |                 |                   |     |   |    |
|------------------------|---------|-----------------|-----------------|-------------------|-----|---|----|
| 30.2.L1                | Denmark | [20]            | IA <sub>1</sub> | 1-1-1-3-1-1-8-6   | 4   | 4 | D1 |
| MB3007 <sup>c</sup>    | USA     | ND              | IA <sub>1</sub> | 1-1-1-3-1-1-8-6   | 4   | 4 | D1 |
| HL082PA1               | USA     | Acne            | IA <sub>1</sub> | 1-1-1-3-1-1-7-6   | 13  | 4 | E5 |
| HL110PA2               | USA     | Acne            | IA <sub>1</sub> | 1-1-1-1-1-1-8-6   | 21  | 4 | E3 |
| 409-HCl <sup>c</sup>   | USA     | ND              | IA <sub>1</sub> | 1-1-1-3-1-1-8-37  | 117 | 4 | D1 |
| CC003-HC2 <sup>c</sup> | USA     | ND              | IA <sub>1</sub> | 1-1-1-3-1-1-8-37  | 117 | 4 | D1 |
| SK187                  | USA     | Skin            | IA <sub>1</sub> | 16-1-1-15-1-4-8-6 | 19  | S | E2 |
| HL037PA1               | USA     | Skin            | IA <sub>2</sub> | 1-1-1-5-1-4-8-2   | 2   | 2 | F4 |
| HL025PA2               | USA     | Skin            | IA <sub>2</sub> | 1-1-1-5-1-4-8-2   | 2   | 2 | F4 |
| HL059PA2               | USA     | Skin            | IA <sub>2</sub> | 1-1-1-5-1-4-8-2   | 2   | 2 | F1 |
| HL059PA1               | USA     | Skin            | IA <sub>2</sub> | 1-1-1-5-1-4-8-2   | 2   | 2 | F1 |
| HL005PA4               | USA     | Skin            | IA <sub>2</sub> | 1-1-1-5-1-4-8-2   | 2   | 2 | F1 |
| HL002PA1               | USA     | Acne            | IA <sub>2</sub> | 1-1-1-5-1-4-8-2   | 2   | 2 | F1 |
| HL027PA1               | USA     | Skin            | IA <sub>2</sub> | 1-1-1-5-1-4-8-2   | 2   | 2 | F1 |
| HL083PA2               | USA     | Acne            | IA <sub>2</sub> | 1-1-1-5-1-4-8-2   | 2   | 2 | F3 |
| HL046PA1               | USA     | Acne            | IA <sub>2</sub> | 1-1-1-5-1-4-8-2   | 2   | 2 | F1 |
| HL013PA1               | USA     | Acne            | IA <sub>2</sub> | 1-1-1-5-1-4-8-2   | 2   | 2 | F1 |
| HL050PA3               | USA     | Skin            | IA <sub>2</sub> | 1-1-1-5-1-4-8-2   | 2   | 2 | F1 |
| HL087PA1               | USA     | Acne            | IA <sub>2</sub> | 1-1-1-5-1-4-8-2   | 2   | 2 | F1 |
| HL087PA3               | USA     | Acne            | IA <sub>2</sub> | 1-1-1-5-1-4-8-2   | 2   | 2 | F1 |
| P.acn33                | France  | Endophthalmitis | IA <sub>2</sub> | 1-1-1-5-1-4-8-2   | 2   | 2 | F1 |
| HL067PA1               | USA     | Acne            | IA <sub>2</sub> | 1-1-1-5-1-4-8-9   | 24  | 2 | F2 |
| P.acn31                | France  | Endophthalmitis | IA <sub>2</sub> | 1-1-1-13-1-4-8-2  | 36  | 2 | F4 |
| HL030PA2               | USA     | Skin            | IA <sub>2</sub> | 1-1-1-5-3-5-8-7   | 22  | S | F4 |
| 20.2.L1                | Denmark | [20]            | IA <sub>2</sub> | 1-1-1-5-3-5-8-7   | 22  | S | F4 |
| P.acn17                | France  | Keratitis       | IA <sub>2</sub> | 1-1-1-5-3-5-8-7   | 22  | S | F5 |
| HL063PA2               | USA     | Skin            | IA <sub>2</sub> | 1-18-1-5-3-5-8-8  | 23  | S | F4 |
| 25.1.R1                | Denmark | [20]            | A <sub>2</sub>  | 1-1-1-18-1-4-8-2  | 57  | 2 | F1 |
| HL050PA1               | USA     | Skin            | IA <sub>2</sub> | 1-1-1-5-1-4-9-2   | 91  | 2 | F1 |
| HL030PA1               | USA     | Acne            | IB              | 1-1-1-4-1-4-8-6   | 5   | 5 | H1 |
| KPA171202 <sup>d</sup> | Germany | Contaminant     | IB              | 1-1-1-4-1-4-8-6   | 5   | 5 | H2 |

|                        |         |                      |     |                      |     |     |    |
|------------------------|---------|----------------------|-----|----------------------|-----|-----|----|
| 6609                   | Hungary | Skin                 | IB  | 1-1-1-4-1-4-8-6      | 5   | 5   | H1 |
| CCUG32901 <sup>e</sup> | Sweden  | Blood                | IB  | 1-1-1-4-1-4-8-6      | 5   | 5   | H1 |
| 434-HC2 <sup>c</sup>   | USA     | ND                   | IB  | 1-1-1-4-1-4-8-6      | 5   | 5   | H1 |
| KPL2008 <sup>c</sup>   | USA     | ND                   | IB  | 1-1-1-4-1-4-8-6      | 5   | 5   | H1 |
| 21.1.L1                | Denmark | [20]                 | IB  | 1-1-12-4-1-4-8-6     | 56  | 5   | H1 |
| P6                     | Germany | Prostate             | IB  | 1-1-1-4-1-4-29-6     | 118 | 5   | H1 |
| PA2                    | USA     | Prostate             | IB  | 1-1-13-4-1-4-8-6     | 119 | 5   | H1 |
| HL097PA1               | USA     | Acne                 | IC  | 9-1-4-8-6-8-14-14    | 70  | 107 | G1 |
| PRP-38                 | UK      | Acne                 | IC  | 9-1-4-8-6-8-14-14    | 70  | 107 | G1 |
| PV66                   | UK      | Acne                 | IC  | 9-1-5-8-6-8-14-6     | 85  | 107 | G1 |
| 5-1-3                  | France  | Acne                 | IC  | 9-1-4-8-6-8-14-6     | 107 | 107 | G1 |
| HL082PA2               | USA     | Acne                 | II  | 17-4-2-4-2-3-10-10   | 6   | 6   | K6 |
| HL060PA1               | USA     | Acne                 | II  | 17-4-2-4-2-3-10-10   | 6   | 6   | K1 |
| HL042PA3               | USA     | Acne                 | II  | 17-4-2-4-2-3-10-10   | 7   | 6   | K2 |
| HL110PA3               | USA     | Acne                 | II  | 15-4-2-4-2-3-10-10   | 7   | 6   | K2 |
| HL110PA4               | USA     | Acne                 | II  | 15-4-2-4-2-3-10-10   | 7   | 6   | K2 |
| HL103PA1               | USA     | Acne                 | II  | 17-9-2-4-2-3-10-10   | 25  | 6   | K1 |
| HL050PA2               | USA     | Skin                 | II  | 17-4-2-17-2-3-11-11  | 26  | S   | K4 |
| J139                   | USA     | Skin                 | II  | 17-4-2-16-2-12-10-12 | 28  | 72  | K8 |
| HL001PA1               | USA     | Skin                 | II  | 17-4-2-4-2-6-10-12   | 30  | 72  | K1 |
| ATCC11828 <sup>f</sup> | USA     | Abscess              | II  | 17-4-2-4-9-12-10-13  | 27  | S   | K9 |
| KPL1847 <sup>c</sup>   | USA     | ND                   | II  | 17-4-2-4-2-3-11-11   | 121 | 6   | K4 |
| KPL1849 <sup>c</sup>   | USA     | ND                   | II  | 17-4-2-4-2-3-11-11   | 121 | 6   | K4 |
| PMH5                   | Denmark | [52]                 | III | 7-6-3-7-5-9-13-16    | 33  | 77  | L1 |
| PMH7                   | Denmark | [52]                 | III | 7-6-3-7-5-9-13-16    | 33  | 77  | L1 |
| Asn12                  | UK      | Spinal disc          | III | 7-6-3-7-5-9-13-16    | 33  | 77  | L1 |
| Asn10                  | UK      | Prosthetic hip joint | III | 7-6-7-7-5-9-12-16    | 81  | 77  | L4 |

<sup>a</sup>Isolates comprising the HMP and other WGS projects listed at <http://www.ncbi.nlm.nih.gov/genome/genomes/1140>

<sup>b</sup>Type strain purchased from the National Collection of Type Cultures (Colindale, UK)

<sup>c</sup>HMP isolates classified as novel *Propionibacterium* spp, but clearly *P. acnes* based on MLST analysis

<sup>d</sup>Strain purchased from the German Collection of Microorganisms and Cell Cultures (DSMZ; Braunschweig, Germany)

<sup>e</sup>Strain from Culture Collection, University of Göteborg

<sup>f</sup>Strain purchased from American Type Culture Collection

<sup>g</sup>Allelic profiles and STs assigned using database at <http://pubmlst.org/pacnes/>

<sup>h</sup>SLST types assigned using database at <http://medbac.dk/slst/pacnes>
